# Supplementary material for: Polymer of intrinsic microporosity-based macroporous membrane with high thermal stability as a Li-ion battery separator
Source: Royal Society of Chemistry journal article supplement (doi:10.1039/c9ra02308a), 2019-01-01
Supplement: c9ra02308a1.pdf [file c9ra02308a1.pdf]

## Supporting Information

# **Polymer of Intrinsic Microporosity based Macroporous Membrane with High Thermal Stability as Li-ion Battery Separator**

Yangyang Tian<sup>a</sup>, Chong Lin<sup>c</sup>, Zhenggong Wang<sup>\*b</sup>, and Jian Jin<sup>\*b,c</sup>

<sup>a</sup>School of Nano Technology and Nano Bionics, University of Science and Technology of China, Hefei 230026, China.

<sup>b</sup>College of Chemistry, Chemical Engineering and Materials Science, Soochow University, Suzhou 215123, China.

<sup>c</sup>*i*-Lab, Suzhou Institute of Nano-Tech and Nano-Bionics, Chinese Academy of Sciences, Suzhou 215123, China.

## Supplemental Figures

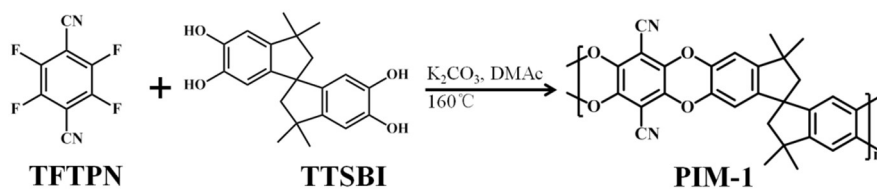

**Figure S1.** Synthesis route of PIM-1.

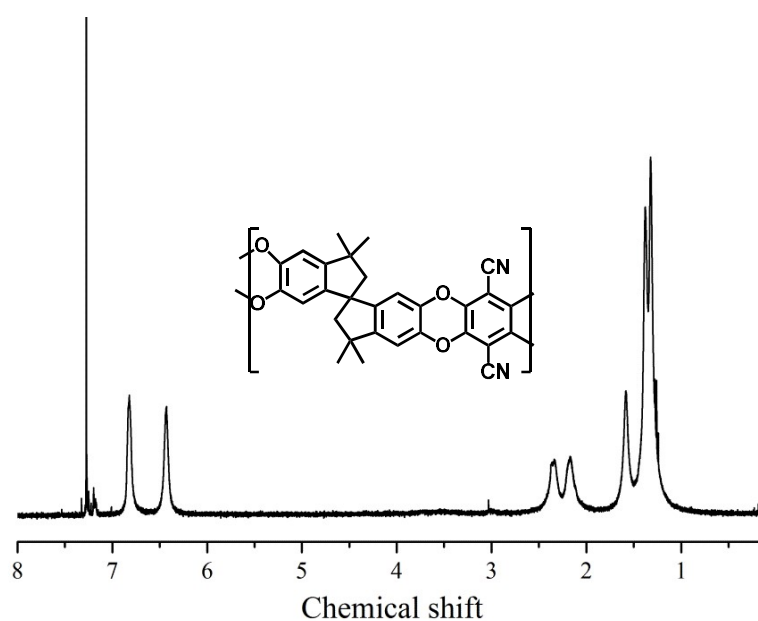

**Figure S2.**  $^1H$  NMR analysis of PIM-1 chemical structure.

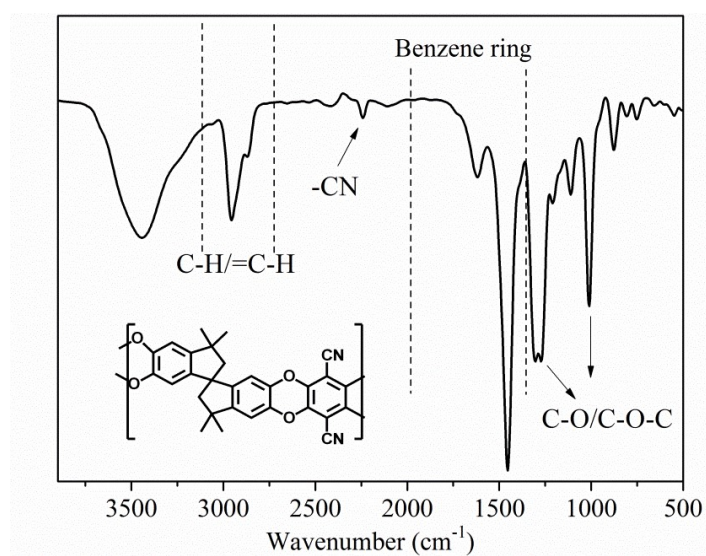

**Figure S3.** FT-IR spectrum of PIM-1.

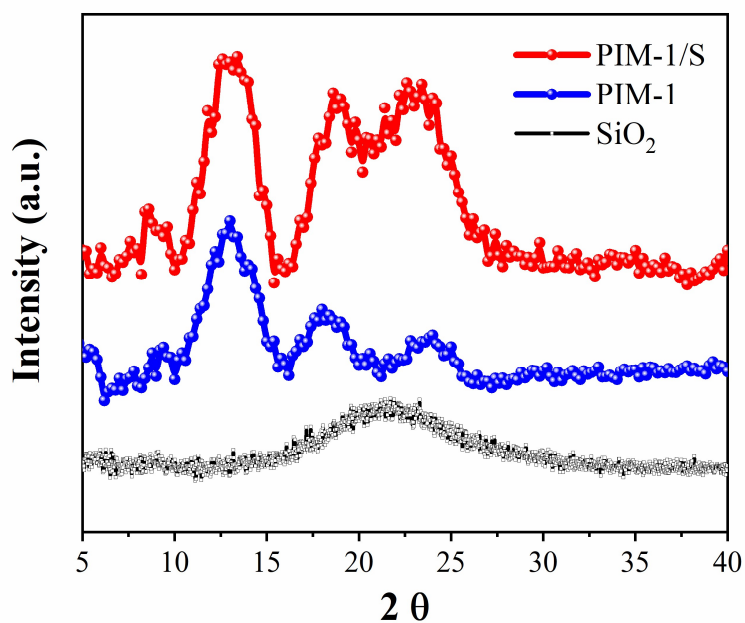

**Figure S4.** XRD pattern of PIM-1, PIM/S membrane and SiO<sub>2</sub> powder.

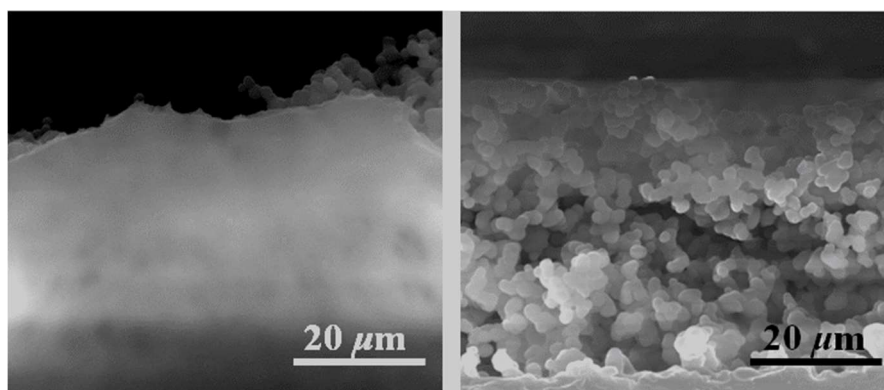

**Figure S5.** Surface (left) and cross-sectional (right) SEM images of PIM-1 membrane prepared by dry phase transition process without the addition of SiO<sub>2</sub> nanoparticles.

As shown in the above figures, the pure PIM-1 membrane without addition of SiO<sub>2</sub> nanoparticle demonstrates dense surface morphology. The phase transition phenomenon only occurs inside the membrane. Ultra-small size and -OH functionalized SiO<sub>2</sub> nanoparticle could furthermore slow down the non-solvent n-butyl alcohol evaporation. After the fast evaporation of CHCl<sub>3</sub>, the adsorbed n-butyl

alcohol still exists inside the membrane. With temperature increase, the adsorbed n-butyl alcohol starts to evaporate and porous surface layer is successfully formed.

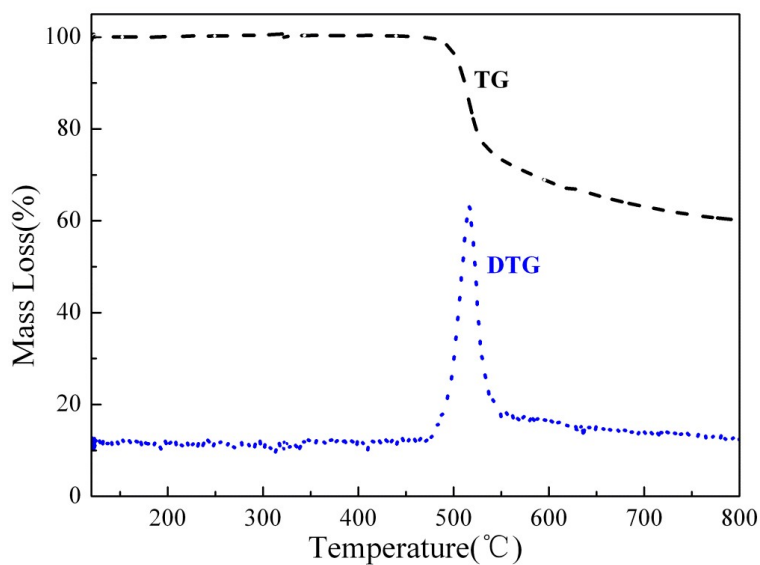

**Figure S6.** TGA and DTG curves of PIM-1.

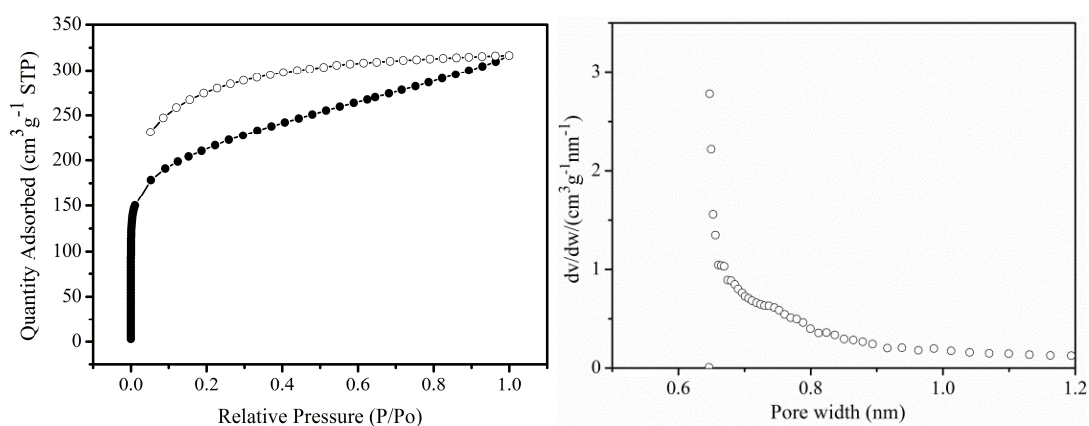

**Figure S7.** (a) N<sub>2</sub> adsorption (filled symbols) and desorption (open symbols) isotherms at 77 K for PIM-1; (b) pore width distribution obtained by analysis of N<sub>2</sub> adsorption by the Horvath-Kawazoe method.

The BET surface area of PIM-1 is 770 m<sup>2</sup>/g. Micropore around 0.7 nm is observed in the figure of pore width distribution.

**Table S1.** Physical properties of PP and PIM-1/S separators with different SiO<sub>2</sub> weight contents.

| Sample      | Porosity [%] | Electrolyte uptake [%] | Li-ion conductivity of cell [ $10^{-4}$ S cm <sup>-1</sup> , 25°C] |
|-------------|--------------|------------------------|--------------------------------------------------------------------|
| PIM-1/S-0%  | ~39          | ~90                    | 0.2                                                                |
| PIM-1/S-5%  | ~55          | ~150                   | 3.2                                                                |
| PIM-1/S-10% | ~67          | ~190                   | 6.0                                                                |
| PIM-1/S-15% | ~75          | ~240                   | 8.2                                                                |
| PIM-1/S-20% | ~81          | ~260                   | 9.0                                                                |
| PP          | ~37          | ~110                   | 5.1                                                                |

The porosity was measured by immersing separators into isobutyl alcohol. After saturated adsorption, the solvent on the surface was wiped and then the weight of wet separator was recorded. The porosity was calculated following the equation (1):

$$\text{Porosity}(\%) = 100 \times \frac{\rho_m \times (M_s - M_d)}{\rho_m \times (M_s - M_d) + \rho_i \times M_d} \quad (1)$$

where  $\rho_m$  and  $\rho_i$  represent the density of the separator matrix and isobutyl alcohol.  $M_s$  and  $M_d$  represent the weight of the saturated and dry separator.

As shown in the table, the Li-ion conductivity and the electrolyte uptake capacity increase greatly with the increase of SiO<sub>2</sub> content. However, high SiO<sub>2</sub> content in the separator will sacrifice the mechanical strength of membrane. In our work, 15% SiO<sub>2</sub> content was chosen under the consideration of both the Li-ion conductivity and the electrolyte uptake and membrane strength.

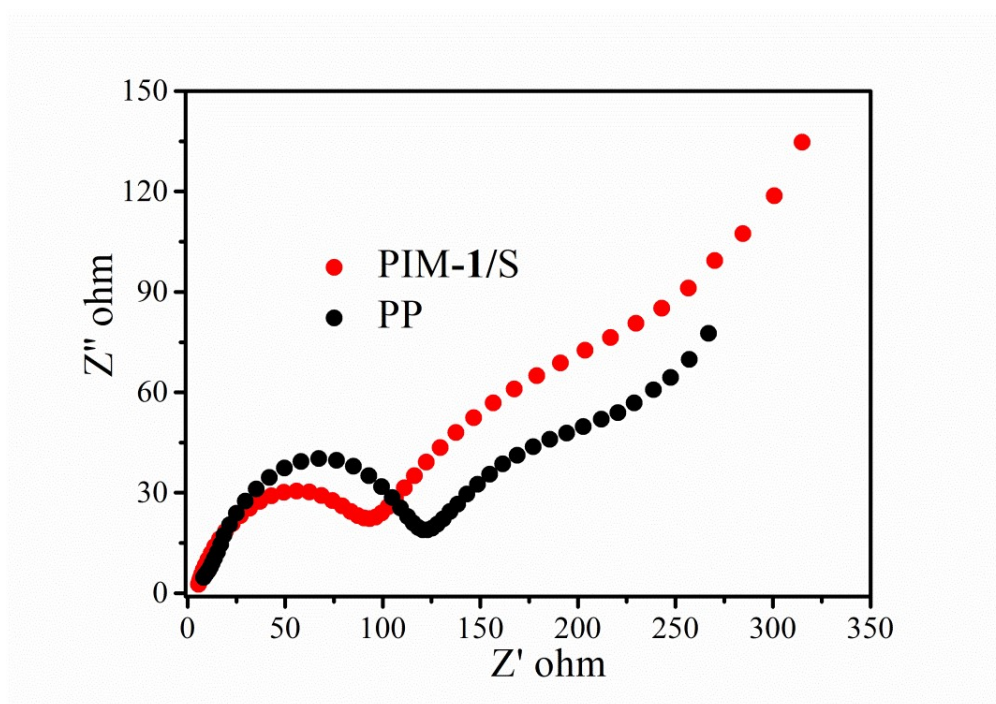

**Figure S8.** Nyquist plots of PIM-1/S and PP cells.
